# Supplementary material for: Epigenetic and transcriptomic alterations in offspring born to women with type 1 diabetes (the EPICOM study)
Source: Springer Nature journal article supplement (doi:10.1186/s12916-022-02514-x), 2022-09-23

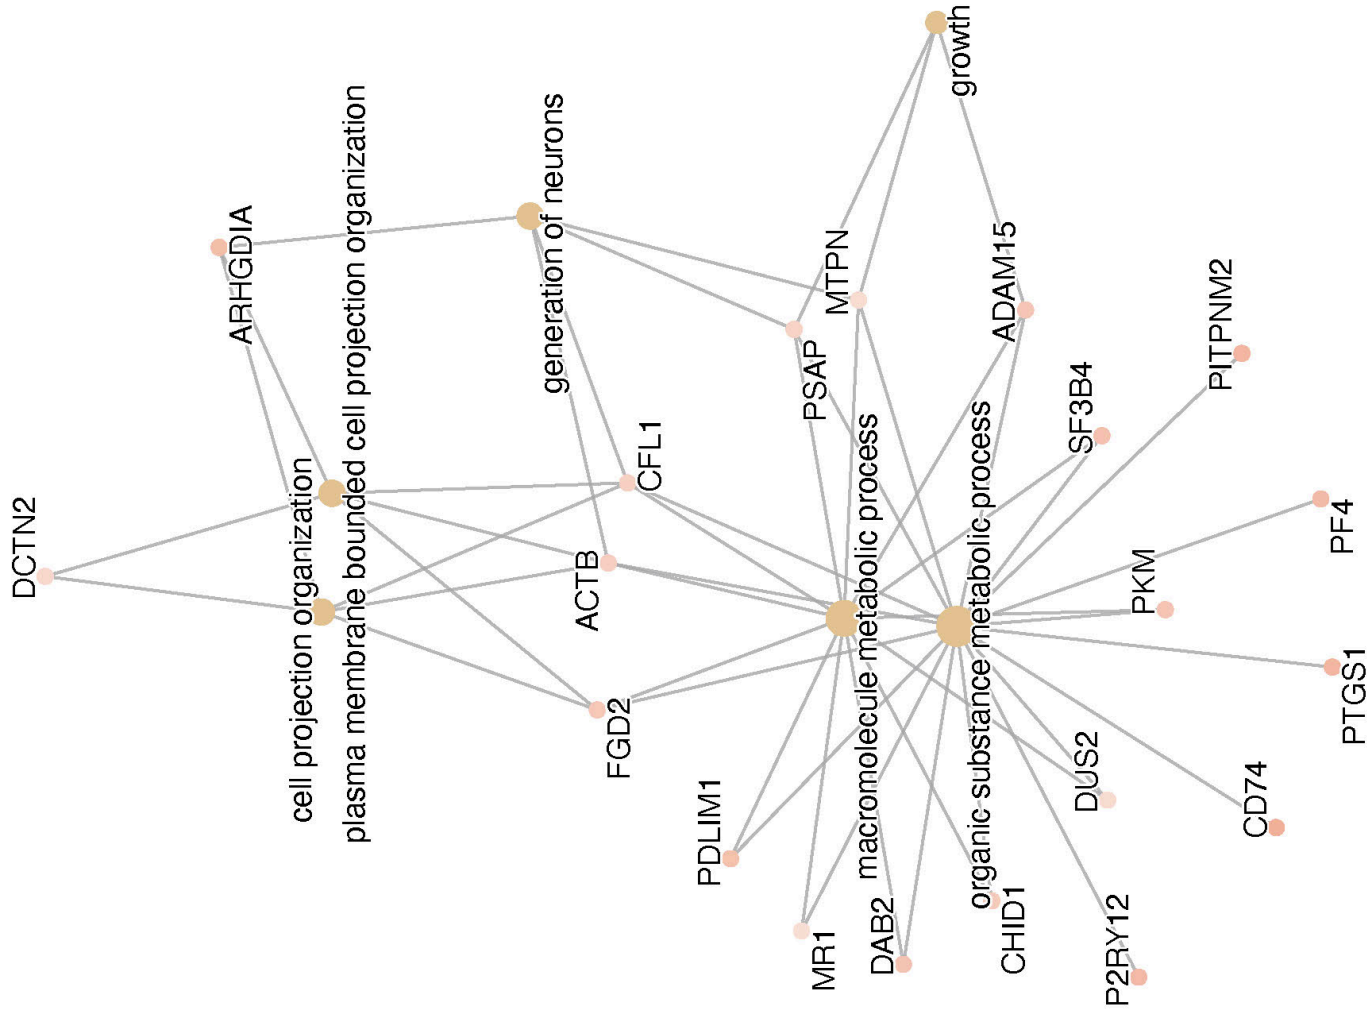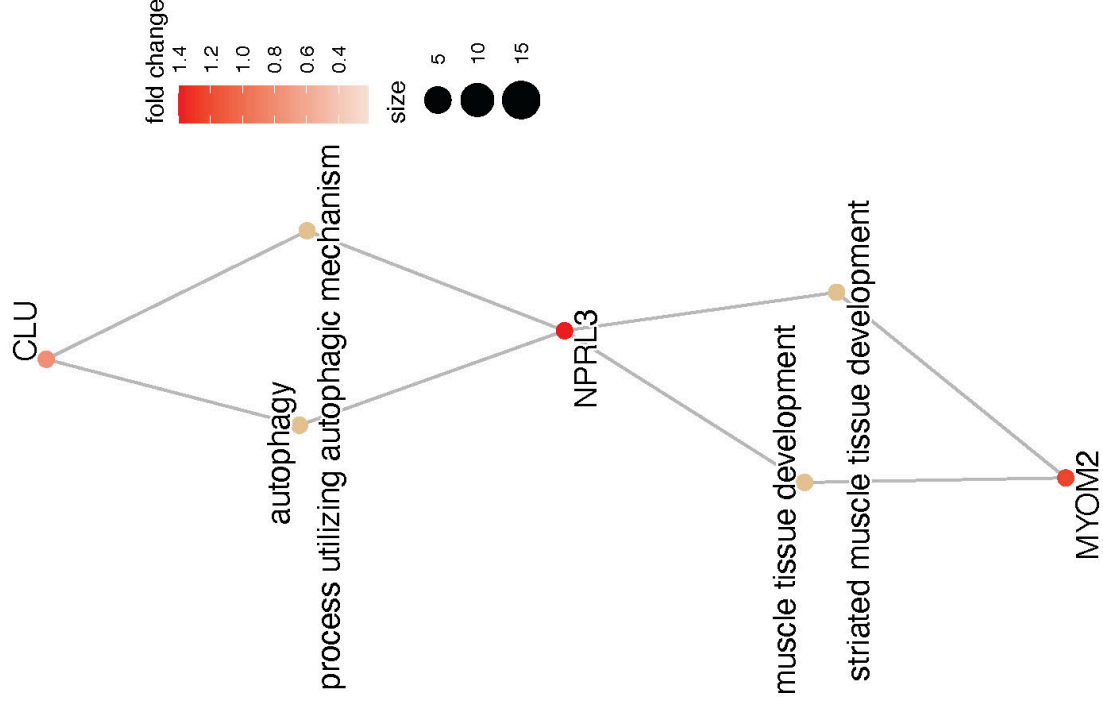

Supplement: MOESM5 [file 23531608]
